# Supplementary material
Source: PubMed Central journal article supplement (PMC1326178)

A) 1 2 3 4 5 6 7 8

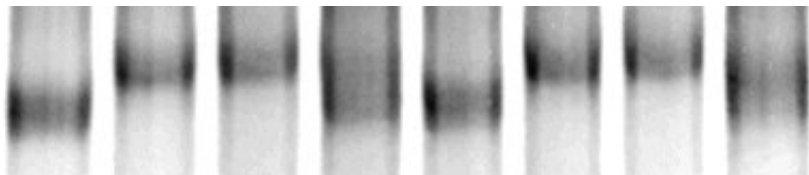

B) 1 2 3 4 5 6

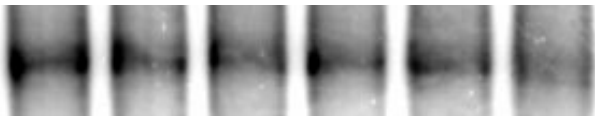

C) 1 2 3 4 5 6 7 8

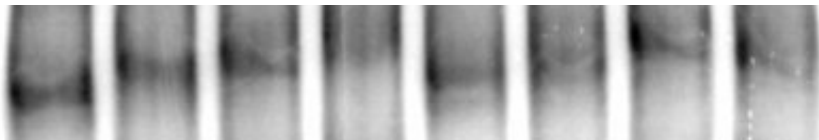

Supplement: pnas_0509744102_1.pdf [file pnas_0509744102_1.pdf]

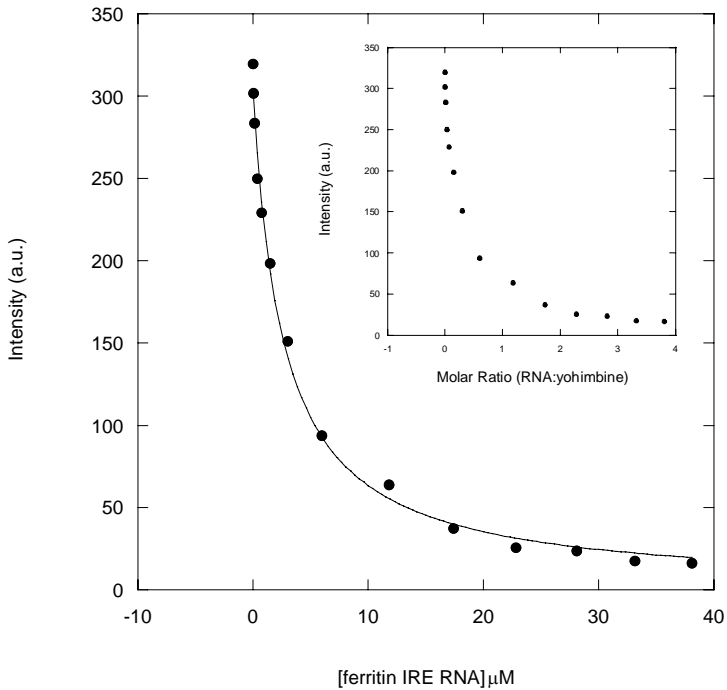

Supplement: pnas_0509744102_2.pdf [file pnas_0509744102_2.pdf]
